# Supplementary material for: BGP-15 Inhibits Hyperglycemia-Aggravated VSMC Calcification Induced by High Phosphate
Source: MDPI journal article supplement (doi:10.3390/ijms22179263), 2021-08-26
Supplement: s1 [file s1]

## **BGP-15 Inhibits Hyperglycemia-Aggravated VSMC Calcification Induced by High Phosphate**

**Annamária Nagy<sup>1,2#</sup>, Dávid Pethő<sup>1,2#</sup>, Rudolf Gesztelyi<sup>4</sup>, Béla Juhász<sup>4</sup>, György Balla<sup>3,5</sup>, Zoltán Szilvássy<sup>4</sup>, József Balla<sup>1,\*</sup>, and Tamás Gáll<sup>1,3</sup>**

<sup>1</sup> Division of Nephrology, Department of Medicine, Faculty of Medicine, University of Debrecen, 4032 Debrecen, Hungary;

<sup>2</sup> Kálmán Laki Doctoral School, Faculty of Medicine, University of Debrecen, 4032 Debrecen, Hungary

<sup>3</sup> HAS-UD Vascular Biology and Myocardial Pathophysiology Research Group, Hungarian Academy of Sciences, University of Debrecen, 4032 Debrecen, Hungary;

<sup>4</sup> Department of Pharmacology and Pharmacotherapy, Faculty of Medicine, University of Debrecen, Nagyerdei krt 98., H-4032 Debrecen, Hungary

<sup>5</sup> Department of Pediatrics, Faculty of Medicine, University of Debrecen, 4032 Debrecen, Hungary

\* Correspondence: balla@belklinika.com; Tel.: +36-52-255-500 / 55004

# These authors contributed equally to this work.

**A**

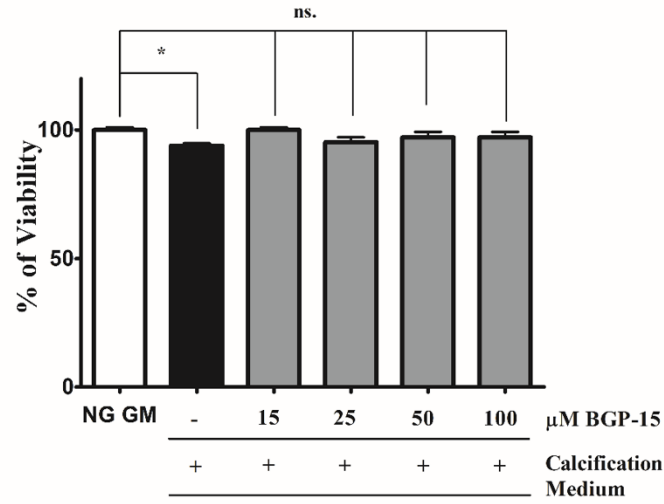

**B**

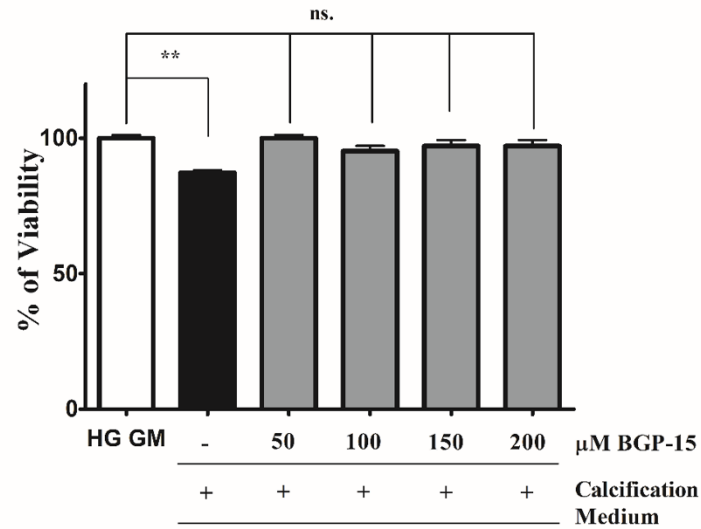

**Figure S1. Viability analysis of BGP-15-treated VSMCs.** VSMCs were cultured in calcification medium containing 3 mmol/L inorganic Pi under normal glucose (5.5 mM glucose) and high glucose (11 mM) conditions in the presence or absence BGP-15 (15-100  $\mu$ M BGP-15 in NG and 25-200  $\mu$ M in HG condition) for 10 days. Cell viability was determined by MTT assay under normal glucose (A) and high glucose (HG) condition. Data are presented as mean  $\pm$  SEM of three independent experiments. Statistical analysis was performed by one-way ANOVA test followed by Bonferroni correction. A value of  $p < 0.05$  was considered significant. *ns*: non-significant; \* $p < 0.05$ , \*\* $p < 0.01$ , \*\*\* $p < 0.001$ .
